# Supplementary material
Source: publisher figshare collection journal article supplement (https://frontiersin.figshare.com/ndownloader/files/17417819)

**Figure S1**

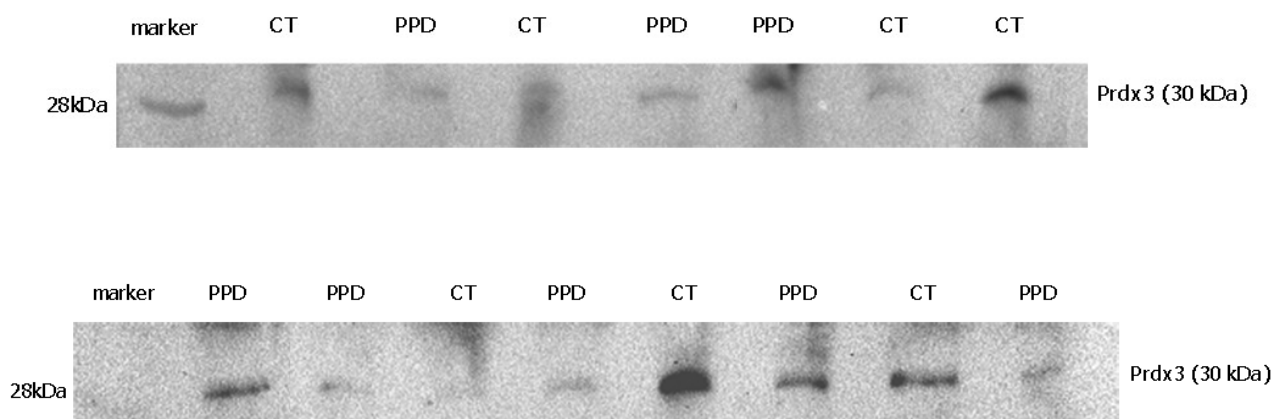

Supplement: Supplementary file [file 17417819]
